## Histamine operates Cl<sup>-</sup>-gated channels in crayfish neurosecretory cells

Jorge Cebada and Ubaldo García\*

Department of Physiology, Biophysics and Neuroscience, Centro de Investigación y de Estudios Avanzados del IPN (CINVESTAV-IPN), Av. Instituto Politécnico Nacional 2508, San Pedro Zacatenco, 07360 México City, México

\*Author for correspondence (e-mail: ugarcia@fisio.cinvestav.mx)

Accepted 3 September 2007

### Summary

We describe a histamine-activated Cl<sup>-</sup> conductance in the X-organ neurons from crayfish *Cherax quadricarinatus*, which has comparable properties to the homomultimeric histamine-gated ion channels described in *Drosophila*. Topical application of histamine inhibited spontaneous neuronal firing in the X-organ sinus gland tract, concomitant with an increase in the membrane conductance. In X-organ neurons in culture and under voltage-clamp conditions, histamine evoked outward currents at -40 mV that reversed at the Cl<sup>-</sup> equilibrium potential. Histamine sensitivity in these neurons had a half-maximal response (EC<sub>50</sub>)=3.3±1 μmol l<sup>-1</sup>, with a Hill number of 2.6±0.4. The histamine-evoked current was blocked by tiotidine, cimetidine, ranitidine and

mepyramine (IC<sub>50</sub>=40±1, 98±3, 256±11 and 483±11 μmol l<sup>-1</sup>, respectively) and *d*-tubocurarine (IC<sub>50</sub>=21±2 μmol l<sup>-1</sup>), but was insensitive to picrotoxin, bicuculline and strychnine. Neither GABA nor glutamate was capable of desensitizing the histamine response, indicating that histamine activates a particular Cl<sup>-</sup> conductance. The presence of immunoreactive neurons to histamine in the medulla terminalis with axonal projections to the neuropile suggests a possible histaminergic modulation of the X-organ sinus gland system.

Key words: Cl<sup>-</sup>-gated channel, ionotropic histamine receptors, X-organ sinus gland system, peptidergic neuron.

### Introduction

Histamine (HA) has been recognized as a transmitter or neuromodulator in crustaceans. The presence of the histidine decarboxylase in neural structures such as thoracic ganglia, brain ganglia and eyestalks of the crab was established by measuring the conversion of [<sup>14</sup>C]histidine to radioactive HA in the presence of pyridoxal-5 phosphate (Arnould, 1987). Immunohistochemical studies demonstrated the presence of HA-like reactivity in lobster stomatogastric ganglion neurons (Dando and Selverston, 1972; Sigvart and Mulloney, 1982; Mulloney and Hall, 1991), thoracic and subesophageal ganglia (Mulloney and Hall, 1991), olfactory lobe (Orona et al., 1990), median protocerebrum, and deutocerebrum and tritocerebrum (Langworthy et al., 1997). By contrast, in the spiny lobster, 14 neurons in the stomatogastric ganglion responded to HA, increasing the Cl<sup>-</sup> conductance (Claiborne and Selverston, 1984). Both *Panulirus argus* and *Homarus americanus* olfactory receptor neurons are inhibited by micromolar concentrations of HA acting directly on gating of a Cl<sup>-</sup> channel (McClintock and Ache, 1989). In addition it has been demonstrated that HA mediates presynaptic inhibition in the escape reaction of the *Procambarus clarkii* crayfish (el Manira and Clarac, 1994), as well as presynaptic inhibition of primary olfactory afferents in lobster (Wachowiak and Cohen, 1999). It is known that HA injected into the circulation inhibits the black pigment dispersion that normally occurs in crabs transferred from a white to a black background in a dose-dependent manner (Hanumante and Fingerma, 1982). Recently we found that

plasma levels of HA in the crayfish fluctuate during the day, reaching a maximum value at daybreak (Cebada et al., 2006). This evidence suggests that HA might be acting as a neuromodulator on the main neurosecretory structure of the crustacean, the X-organ sinus gland system (XO-SG). In agreement with our present findings, HA activates a Cl<sup>-</sup> current in crayfish X-organ that has comparable properties to the homomultimeric HA-gated ion channels expressed in *Xenopus* oocytes injected with cRNAs that encode for HisCl-1 or HisCl-α2 (Zheng et al., 2002; Gisselmann et al., 2002).

The XO-SG system is formed by 120 monopolar neurons, whose axons converge within the medulla terminalis, forming a tract that runs distally to end in an neurohemal organ (SG), located between the medulla interna (MI) and the medulla externa (ME) of the eyestalk. This system participates in the control of different functions, such as molting, regulation of blood glucose levels, tegumentary and retinal pigment position, locomotion and neuronal activity (Fingerma, 1997; García and Aréchiga, 1998). Both spontaneous electrical activity and hormone release in X-organ neurons are regulated by environmental and endogenous influences, such as light and darkness, stress and circadian rhythms. These influences appear to be mediated by a host of neurotransmitters or modulators, most noticeably, GABA, glutamate (Glu) and serotonin (García and Aréchiga, 1998). GABA and Glu activate independent Cl<sup>-</sup>-gated channels in crab X-organ neurons (Duan and Cooke, 2000). In the crayfish X-organ neurons GABA induces a biphasic response, where the excitatory phase is due to the

activation of a Na<sup>+</sup>-dependent inward current associated with the GABA uptake, that is followed by an inhibitory phase due to the activation of a Cl<sup>-</sup> dependent outward current which is associated with the activation of GABA<sub>A</sub>-like receptors (Garduño et al., 2002).

## Materials and methods

### Animals

Adult male and female specimens of *Cherax quadricarinatus* (von Martens 1868) of mass 60–80 g were obtained from a freshwater crayfish farm (Jojutla, Morelos, Mexico). Before experimentation, the animals were maintained in filtered water for at least 1 week in recirculating water tanks at 20°C under laboratory conditions, with *ad libitum* food and under 12 h:12 h light:dark cycles.

### Dissection and culture

The method for isolating the eyestalk and intracellular recording was as described previously (Onetti et al., 1990). To obtain neuronal cultures, the animals were deeply anesthetized by burying them in triturate ice for 20 min, then the eyestalks were excised and placed in chilled crayfish saline solution, consisting of (in mmol l<sup>-1</sup>): 205 NaCl, 5.4 KCl, 2.6 MgCl<sub>2</sub>, 13.5 CaCl<sub>2</sub> and 10 Hepes adjusted to pH 7.4 with NaOH. The exoskeleton, muscles and connective tissue surrounding the neural structures were carefully removed under a dissecting microscope. Isolated X-organs were incubated with 200 µg ml<sup>-1</sup> collagenase dispase (Roche, Mannheim, Germany) dissolved in modified Leibovitz L-15 (Gibco, Rockville, MD, USA) culture medium for 60 min. The enzyme was washed out, and the X-organ neurons were dissociated by gentle suction through fire-polished micropipettes, as described previously for the leech Retzius cells (García et al., 1990), and plated onto a 200 µl recording chamber, precoated with Concanavaline A (Type III, Sigma, St Louis, MO, USA). The ionic composition of the culture medium was adjusted to that of the crayfish saline solution. An additional 5.5 mmol l<sup>-1</sup> glucose, 2 mmol l<sup>-1</sup> L-glutamine, 16 µg ml<sup>-1</sup> gentamycin (Schering-Plough, Mexico City, Mexico), 5 µg ml<sup>-1</sup> streptomycin (Sigma) and 5 units ml<sup>-1</sup> penicillin (Sigma) were added. Culture cells were kept in darkness for 24 h before the experiments were conducted.

### Electrophysiology

Current- and voltage-clamp experiments in the standard whole-cell configuration were performed in X-organ neurons plated in the recording chambers, and mounted on the stage of an inverted microscope Diaphot (Nikon, Melville, NY, USA). The cells were continuously superfused with crayfish saline solution, but in some experiments, the bath solution was modified by reducing the NaCl concentration to 80 mmol l<sup>-1</sup> and replaced equimolarly by sodium-methanesulfonate. Recordings were carried out using an Axopatch 200A amplifier (Axon Instruments, Sunnyvale, CA, USA) and then the low-pass filtered at 10 kHz with a four-pole Bessel filter and stored on a computer disk using commercially available hardware and software (Axon Instruments). To eliminate error signals caused by the pipette and holder capacitance, in cell-attached configuration, a -5 mV pulse was applied to cancel the fast

transient. The same pulse was used in the whole-cell configuration to compensate both the cell membrane capacitive current and the series resistance, using the compensation circuits of the amplifier. The series resistance was estimated in the range 2.5–4.5 MΩ and reduced by 50–70%. Recording electrodes (2–3 MΩ) from borosilicate glass (Sutter Instruments, San Rafael, CA, USA) were filled with a solution consisting of (in mmol l<sup>-1</sup>): 195 KCH<sub>3</sub>SO<sub>4</sub>, 12 KCl, 2 CaCl<sub>2</sub>, 2 MgCl<sub>2</sub>, 5 EGTA-Na and 10 Hepes.

HA pulses were applied through a 'Y' tube placed 100 µm from the neurons, with continuous superfusion of crayfish saline solution. HA, mepyramine, tiotidine, cimetidine and ranitidine were purchased from RBI (Natick, MA, USA) and picrotoxin, bicuculline, strychnine and *d*-tubocurarine from Sigma. All solutions were prepared on the day of use.

### Immunocytochemical staining

The eyestalks were fixed overnight in Bouin's solution at 4°C (10% formaldehyde, 5% glacial acetic acid and 75% picric acid, saturated aqueous solution), and then washed several times in sodium phosphate buffer (PBS) 0.1 mol l<sup>-1</sup>, adjusted to pH 7.4. Then the eyestalks were permeabilized by incubation overnight with PBS solution containing 5% Triton X-100 (PBS-Triton). To prevent non-specific binding, the eyestalks were incubated for 4 h in a blocking solution consisting of 10% normal goat serum (Vector Lab., Burlingame, CA, USA) in PBS-Triton. After washing, the neural tissues were incubated in the primary antibody for 3 days at 4°C (rabbit anti-HA polyclonal antibody, Chemicon Int. Inc., Temecula, CA, USA), this antibody was diluted 1:500 in PBS-Triton. Then the eyestalks were rinsed three times and incubated in the secondary antiserum for 5 h at room temperature under darkness. Secondary antibody solution was goat anti-rabbit conjugated with fluorescein (FITC; 5 µg ml<sup>-1</sup>; Vector Lab.) in the same buffer as the primary antibody. After washing, the eyestalks were dehydrated in a graded alcohol series from 50% to absolute ethanol (5 min each) and cleared with methylsalicylate (Merck, Darmstadt, Germany). The stained eyestalks were visualized using a confocal microscope TCS P2 (Leica, Heildelberg, Germany) equipped with an Argon-Crypton ion laser. Optical sections (1 µm) were collected in sequential mode and examined in stacks.

## Results

### Effects of HA on the X-organ neurons

To evaluate the HA effects on the XO-SG system, extracellular multiunitary and intracellular recordings were simultaneously obtained from XO-SG tract and X-organ cell bodies, respectively, in the isolated eyestalk preparation (Fig. 1A). In order to confirm that all the electrical activity recorded in the tract arose from the X-organ neurons, in some experiments (*N*=5) the X-organ somata were retrogradely stained by pressure injection of the tract with Calcium Green-dextran (10 kDa) dissolved in crayfish saline solution together with 0.01% Triton X-100 (Fig. 1B). In all cases, we confirmed by fluorescence microscopy that the X-organ cell bodies were stained exclusively. HA superfusion (50 µmol l<sup>-1</sup>) notably reduced the spontaneous activity that propagates along the tract (Fig. 1C, upper trace), and elicited a sustained hyperpolarization

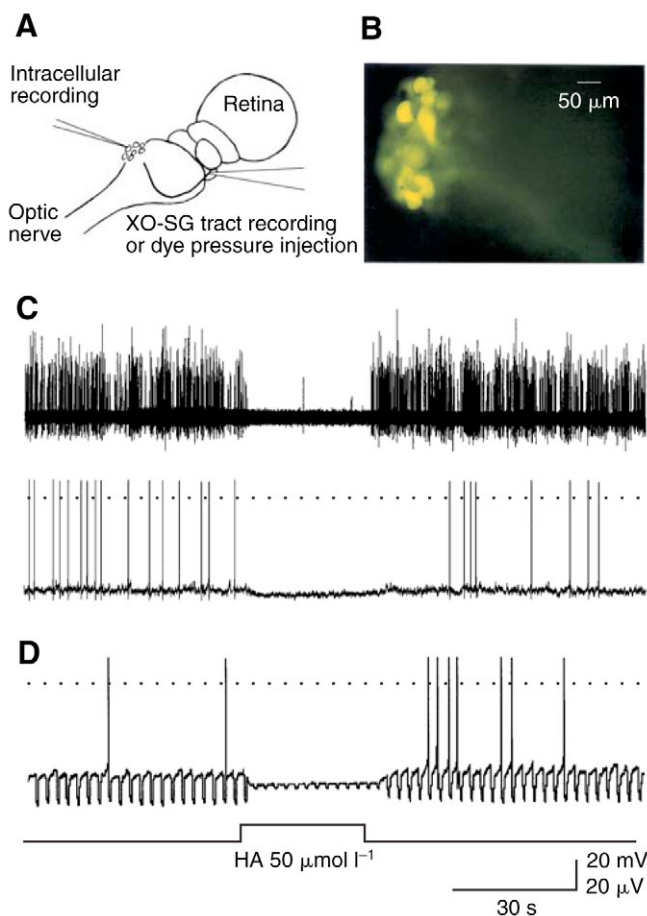

Fig. 1. HA inhibits the excitability of the XO-SG system in the isolated eyestalk preparation. (A) Schematic representation of the experimental array used to obtain simultaneous recordings from an X-organ cell body and the XO-SG tract. (B) Fluorescence micrograph of the X-organ region obtained after retrograde staining of the tract OX-SG with Calcium Green-dextran. (C) Effect of HA on the spontaneous electrical activity propagated along the XO-SG tract (upper trace); note that during the HA superfusion ( $50 \mu\text{mol l}^{-1}$ ) most of the electrical activity was inhibited. This effect is due to the hyperpolarization evoked by HA on the X-organ cells (intracellular recording, bottom trace). (D) Hyperpolarization evoked by HA is associated with an increase in membrane conductance, indicated by reduction of the input resistance. The dotted lines indicate zero membrane potential.

that suppressed neuronal firing in tonically active neurons (Fig. 1C, bottom trace). The hyperpolarization induced by HA ( $50 \mu\text{mol l}^{-1}$ ) was accompanied by a significant decay in membrane input resistance, and was dependent on the concentration tested (Fig. 1D) in neurons where current pulses ( $-20 \text{ pA}$ ,  $750 \text{ ms}$ ,  $0.5 \text{ Hz}$ ) were applied to evaluate changes in input resistance, which were reduced drastically during the HA superfusion. On average, the reductions in input resistance were 8%, 45%, 72% and 88% for HA concentrations of 1, 5, 10 and  $50 \mu\text{mol l}^{-1}$ , respectively. These results suggest that HA activates a  $\text{Cl}^-$  conductance, since the hyperpolarization is due to an increase in the membrane conductance.

To test whether HA activated a  $\text{Cl}^-$  current, X-organ neurons were dissociated and cultured for 24 h and the HA-evoked

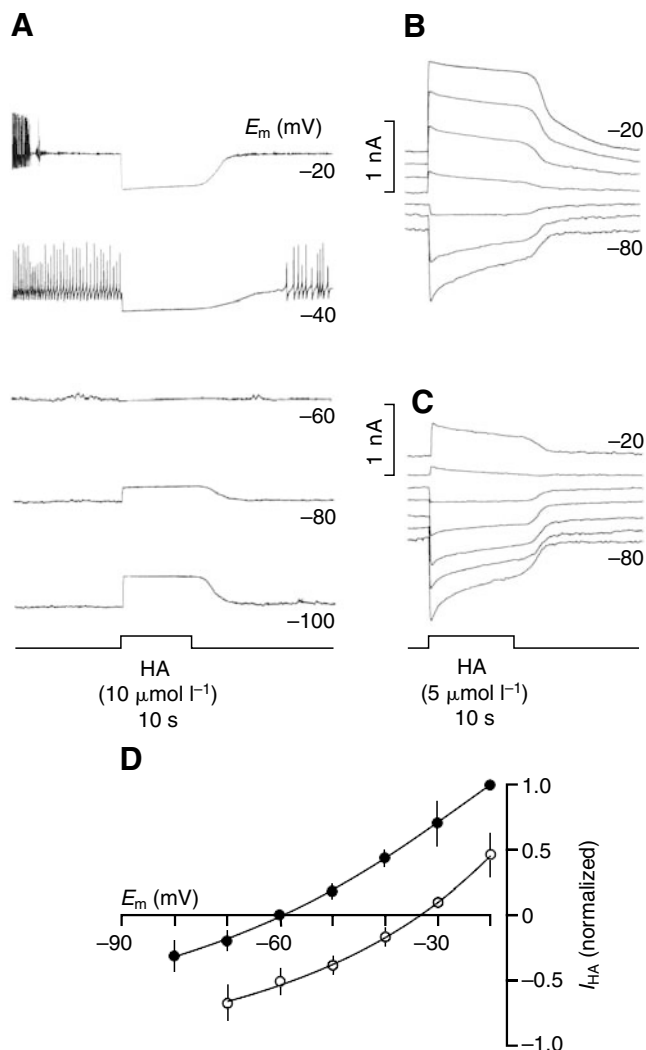

Fig. 2. HA activates a  $\text{Cl}^-$  conductance in X-organ neurons. (A) Current-clamp recordings from an X-organ neuron in culture. Note that during the application of HA, the membrane potential ( $E_m$ ) reached  $-60 \text{ mV}$  at all holding potentials explored. (B,C) HA-evoked currents ( $I_{\text{HA}}$ ) obtained at different holding potentials from  $-80$  to  $-20 \text{ mV}$ ; the interval between each HA pulse was 3 min. All the traces were obtained from the same neuron at two  $\text{Cl}^-$  equilibrium potentials ( $-62.5 \text{ mV}$  for B and  $-32 \text{ mV}$  for C). (D) Current-voltage relationship for the experimental conditions described in B and C. Both the solid circle and open circle curves correspond to the average  $\pm$  s.e.m. of 12 cells, and the  $\text{Cl}^-$  equilibrium potential corresponded to  $-62.5 \text{ mV}$  or  $-32 \text{ mV}$ , respectively.

response was recorded in current-clamp conditions at membrane potentials from  $-100$  to  $-20 \text{ mV}$  using pipettes filled with the described internal solution. The voltage changes accompanying the HA response were dependent on the membrane potential; in all cases, voltage changes evoked by HA caused the membrane potential to decrease to  $-60 \text{ mV}$  (Fig. 2A). Hyperpolarizing responses were observed at less polarized potentials and depolarizing responses at more polarized potentials. The reversal potential value suggested that the response is mediated by a  $\text{Cl}^-$  current. In addition, in voltage-clamp conditions HA-evoked currents reversed at the  $\text{Cl}^-$  equilibrium potentials ( $E_{\text{Cl}}$ )

recorded. As illustrated in the Fig. 2B, HA-evoked currents reversed between  $-65$  and  $-55$  mV when the  $E_{Cl}$  corresponded to  $-62.5$  mV and reversed between  $-40$  and  $-30$  mV when the extracellular solution was modified to obtain a new  $E_{Cl}$  ( $-32$  mV). The results of these experiments are summarized in Fig. 2D. The current–voltage curves obtained for both experimental conditions indicated that the zero current potential corresponded to  $-60 \pm 3$  mV and  $-32 \pm 2$  mV.

In agreement with previous results for some other HA-activated  $Cl^-$  channels (Hardie, 1989), the time course of the response to HA developed with latency  $<0.5$  s, making it unlikely that a second messenger is involved. This conclusion is supported by the long-term stability (at least 1 h) of whole cell currents in the presence of only simple buffered saline.

#### HA activates receptors other than GABA or Glu in X-organ neurons

Previous work (Duan and Cooke, 2000) has shown that GABA and Glu activate different receptors and  $Cl^-$  conductances in crab X-organ neurons. To explore the time course of the currents elicited by HA, GABA or Glu, the cells were maintained at  $-40$  mV holding potential using the standard pipette solution (calculated Nernst potential,  $E_{Cl}$  is approximately  $-62.5$  mV), in order to evoke  $Cl^-$  outward currents in each case. For Glu responses, in 50% of the neurons tested ( $N=12$ ), the Glu-evoked current reached its maximum value within the first 300 ms and then declined to 20% of the peak amplitude, generating a sustained current during the continued application of Glu (Fig. 3A). In the other 50% of the cells, Glu elicited a fully desensitizing current; similar results have been described previously (Duan and Cooke, 2000). By contrast, as previously reported in crayfish X-organ neurons (Garduño et al., 2002), GABA-evoked currents exhibited two components: an early transient inward current due to the electrogenic GABA uptake, followed by a sustained outward current generated through ligand-gated  $Cl^-$  channels (Fig. 3A, middle trace). Finally, the HA-evoked current declined slowly during the continued application (Fig. 3A, right trace). The time courses of the currents activated by Glu, GABA or HA suggest that different receptor types mediate each one of these responses. However, possible heterologous desensitization by GABA or Glu of the HA-evoked current was explored. Both Glu- and GABA-evoked  $Cl^-$  currents in X-organ neurons show significant desensitization when low concentrations of such substances are present in the bathing solution during the application of test pulses at concentrations close to the respective  $EC_{50}$  values ( $10 \mu\text{mol l}^{-1}$  for GABA and  $32 \mu\text{mol l}^{-1}$  for Glu). Fig. 3B (upper traces) shows superimposed recordings obtained in response to Glu pulses applied before, during and after the superfusion of a low Glu concentration ( $3 \mu\text{mol l}^{-1}$ ). The trace marked by the arrow was obtained under these conditions; note that the transient current was reduced notably but the amplitude of the sustained current remained the same. The other two traces correspond to the control condition and after the Glu washout. The recordings shown in Fig. 3B (bottom) were obtained from the same neuron but in response to HA, before, during and after the superfusion of Glu. Note that neither the amplitude nor the time course of the HA response was modified. Similar results were obtained when  $1 \mu\text{mol l}^{-1}$

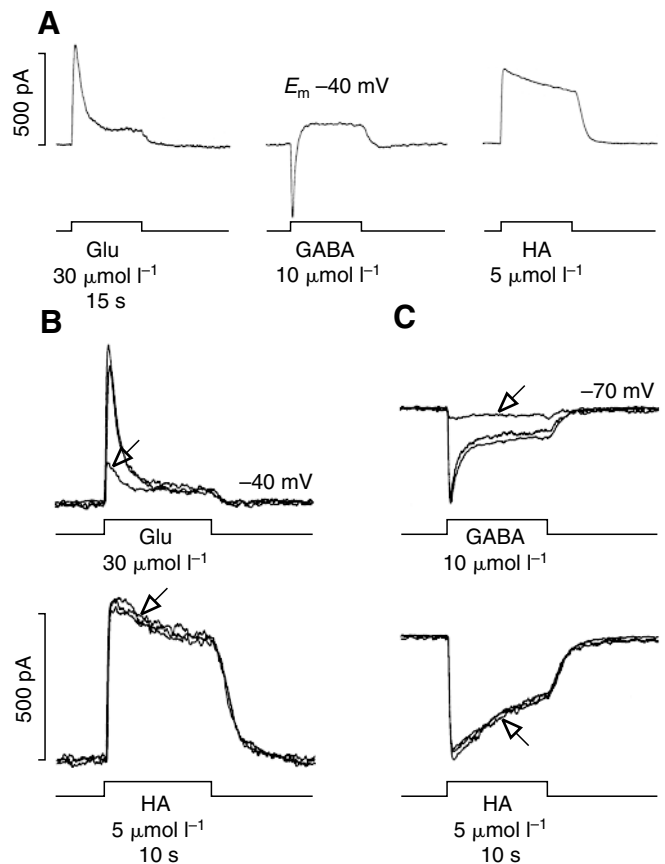

Fig. 3.  $Cl^-$  ligand-gated currents in X-organ neurons. (A) Representative current traces obtained from the same neuron in response to the  $EC_{50}$  concentrations for Glu, GABA and HA. (B) Glu-evoked currents obtained after, during and before the superfusion of a desensitizing Glu concentration ( $3 \mu\text{mol l}^{-1}$ , upper traces); note that the HA-evoked currents modified neither the amplitude nor the time course during the Glu superfusion (bottom traces). (C) As in B, GABA superfusion ( $1 \mu\text{mol l}^{-1}$ ) did not modify the HA-evoked current (bottom traces), but desensitized the GABA response (upper traces). Arrows mark the current traces obtained during the superfusion of Glu or GABA.

GABA was superfused during the HA pulse application (Fig. 3C).

#### HA dose–response relationship

The dose–response was explored by applying histamine pulses at concentrations between  $0.01$  to  $100 \mu\text{mol l}^{-1}$ ; at least five concentrations were tested in the same cell with washout intervals of 3 min. Low HA concentrations ( $0.01$  to  $0.1 \mu\text{mol l}^{-1}$ ) failed to induce detectable currents, whereas concentrations between  $1$  and  $2.5 \mu\text{mol l}^{-1}$  elicited sustained currents. Higher concentrations ( $5$ – $100 \mu\text{mol l}^{-1}$ ) induced a fast desensitizing component followed by a slower desensitizing component (Fig. 4A). The HA-induced current was measured at the peak and these values were plotted against the log of the HA concentration, giving a concentration inducing a half-maximal response ( $EC_{50}$ ) of  $3.28 \pm 1 \mu\text{mol l}^{-1}$  and Hill number of  $2.6 \pm 0.4$  (Fig. 4B). The  $EC_{50}$  value for HA differs considerably from those reported

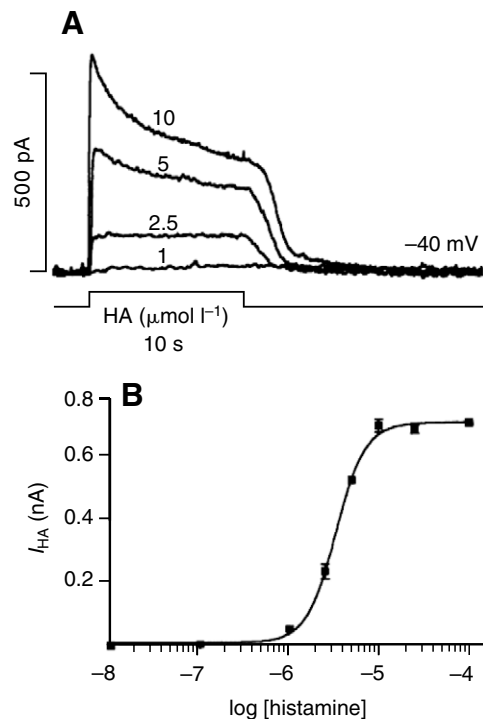

Fig. 4. X-organ neuron sensitivity to HA. (A) Representative HA-evoked currents obtained at  $-40$  mV holding potential, during application of HA pulses at the indicated concentrations. (B) Peak currents (mean  $\pm$  s.e.m.) versus HA concentration (3–5 observations per point). The solid line correspond to a non-linear regression using  $I_{\max}=1/[1+(EC_{50}/HA)^n]$ , where HA=molar HA concentration,  $n$ =the Hill coefficient and  $EC_{50}$ =HA concentration giving half-maximal effect, being the free parameters. The fit yielded  $EC_{50}=3.3\pm 1$   $\mu\text{mol l}^{-1}$  and  $n=2.6\pm 0.4$ .

for Glu and GABA (Duan and Cooke, 2000; Garduño et al., 2002). Previous work has shown that the homomeric expression of the mRNAs encoding HA-gated  $\text{Cl}^-$  channel subunits from the fruit fly *Drosophila melanogaster* produced HA receptors with  $EC_{50}$  values of  $166\pm 12$   $\mu\text{mol l}^{-1}$  for DM-HisCl- $\alpha 1$  and  $10.8\pm 0.46$  DM-HisCl- $\alpha 2$  (Gisselmann et al., 2002), whereas those for HisCl-1 and HisCl-2 were  $4.2\pm 1.3$  and  $14\pm 2.5$ , respectively (Zheng et al., 2002). The HA receptor sensitivity in X-organ neurons was close to the homomultimeric HA-gated  $\text{Cl}^-$  channels HisCl-1 and DM-HisCl- $\alpha 2$ . The pharmacological profile of the HA response in X-organ neurones cannot easily be classified within the pharmacological categories developed in mammals. The histamine receptors are a class of endogenous ligand. Activation of HA metabotropic receptors involves cytoplasmic second messengers, cofactors, coupling proteins and enzymes, and often could not occur in cells perfused internally by salts alone (Hille, 2001). Our results suggest that the HA response is mediated by ligand-gated anion channels.

#### Pharmacology

##### *Cl<sup>-</sup> channel blockers*

Picrotoxin at concentrations between 1 and 100  $\mu\text{mol l}^{-1}$  blocks most of the inhibitory Glu receptor, as well as  $\text{GABA}_A$ -

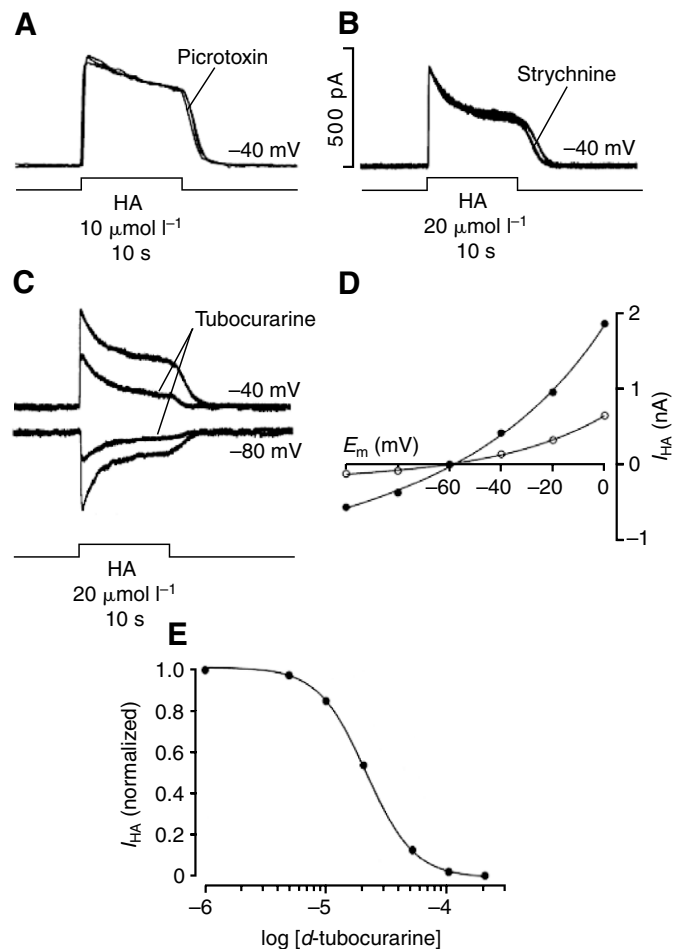

Fig. 5. Effects of  $\text{Cl}^-$  channel blockers on the HA response in X-organ neurons. (A,B) Superimposed current traces obtained after, during and before the superfusion of  $\text{Cl}^-$  channel blockers. Neither picrotoxin nor strychnine at  $100$   $\mu\text{mol l}^{-1}$  modified the HA-evoked current. (C) The cholinergic antagonist, *d*-tubocurarine (dTC;  $20$   $\mu\text{mol l}^{-1}$ ) blocked the HA-evoked current reversibly. (D) Average current–voltage curves (5 observations per point); solid circles, control conditions; open circles, blockage exerted by dTC. (E) Inhibition curve. Each point represents the average value for five observations. The solid line corresponds to a non-linear regression giving an adjusted  $IC_{50}=21\pm 2$   $\mu\text{mol l}^{-1}$ .

like receptors from invertebrates (Lunt, 1991; Cleland, 1996). In contrast, the  $\text{Cl}^-$  currents evoked by HA in crustacean preparations are insensitive to picrotoxin (Claiborne and Selverston, 1984; McClintock and Ache, 1989; Hashemzadeh-Gargari and Freschi, 1992; el Manira and Clarac, 1994). We found that the HA response in X-organ neurons was also insensitive to picrotoxin even at high concentrations ( $100$   $\mu\text{mol l}^{-1}$ ). Fig. 5A illustrates representative current traces obtained before, during and after picrotoxin superfusion.

To date, glycine-gated  $\text{Cl}^-$  channels have not been identified in invertebrates (Roeder, 2003), but the HA-gated  $\text{Cl}^-$  channel subunits from *Drosophila melanogaster* show the highest degree of homology to human glycine receptors (Witte et al., 2002). By contrast, strychnine is a specific antagonist of these receptors that reversibly inhibited the glycine-induced currents. We did not detect glycine-evoked currents in X-organ neurons

( $N=12$ ) nor blockage of the HA-evoked currents with strychnine concentrations of  $10\text{--}100\ \mu\text{mol l}^{-1}$  (Fig. 5B).

The inhibitory effect of the competitive antagonist from the curare family, *d*-tubocurarine (dTC), on HA-activated  $\text{Cl}^-$  channels in crustacean preparations such as stomatogastric ganglion cells (Claiborne and Selverston, 1984), olfactory receptor neurons (Bayer et al., 1989) and cardiac ganglion motor neurons (Hashemzadeh-Gargari and Freschi, 1992), is well documented, as well as in oocytes that express HA-gated  $\text{Cl}^-$  channels (Gisselmann et al., 2002). In agreement with the above-mentioned reports, we found that dTC reversibly blocked the HA response in X-organ cells with an  $\text{IC}_{50}$  of  $21\pm 2\ \mu\text{mol l}^{-1}$  (Fig. 5E). Fig. 5C shows current traces elicited by  $20\ \mu\text{mol l}^{-1}$  HA obtained after and during the superfusion of dTC at the indicated potentials. Note that the blockage exerted by the antagonist was dependent on the holding potential, resulting in more effective hyperpolarizing potentials (Fig. 5D). This result supports the notion that the HA  $\text{Cl}^-$ -gated current in crayfish X-organ neurons is generated by native receptors, with similar characteristics to those described for DM-HisCl receptors.

#### HA antagonists

Fig. 6 illustrates the effect on the HA-evoked currents obtained at  $-40\ \text{mV}$  from four different cells, before, during and after the superfusion of competitive antagonists type H1 and H2. In the presence of mepyramine ( $500\ \mu\text{mol l}^{-1}$ ), the residual current desensitized rapidly and almost completely (Fig. 6A), whereas in the presence of the H2 antagonists (ranitidine, tiotidine and cimetidine), the residual current did not show desensitization during the continuous application of HA (Fig. 6B,C,D). The blockage exerted by all the antagonists was fully reversible. Mepyramine was the least potent, at concentrations of  $1\text{--}10\ \mu\text{mol l}^{-1}$ , and the amplitude of the HA-evoked current remained unchanged, reaching complete inhibition at concentrations close to  $2\ \text{mmol l}^{-1}$ , and with an  $\text{IC}_{50}$  of  $483\pm 11\ \mu\text{mol l}^{-1}$  (Fig. 6E, triangles). The  $\text{IC}_{50}$  values for the H2 antagonists were  $40\pm 1.3\ \mu\text{mol l}^{-1}$  for tiotidine,  $98\pm 2.6\ \mu\text{mol l}^{-1}$  for cimetidine and  $256\pm 11\ \mu\text{mol l}^{-1}$  for ranitidine (Fig. 6E, squares, diamonds and circles, respectively). These results are in agreement with previous reports where  $\text{Cl}^-$  conductance-gated by HA in *Musca domestica* and crustacean neurons was blocked predominantly by H2 antagonists (Hardie, 1989; McClintock and Ache, 1989; Hashemzadeh-Gargari and Freschi, 1992). In addition, the pharmacological profile that we found is quite similar to those reported for the HA-gated  $\text{Cl}^-$  channel type DM-HisCl- $\alpha 2$  functional expressed in oocytes (Gisselmann et al., 2002).

#### HA-like immunolabeling

To examine the distribution of HA immunoreactivity in the eyestalk, we carried out whole-mount immunocytochemistry followed by confocal microscopy. HA immunoreactivity in the eyestalk was concentrated in photoreceptors at the rhabdoms and under the basement membrane at the cartridges where the photoreceptor axons contact with monopolar neurons in the first synapse of the visual pathway (not shown). At the medulla terminalis we found consistently ( $N=8$  preparations) one neuron located dorsally at the border of the

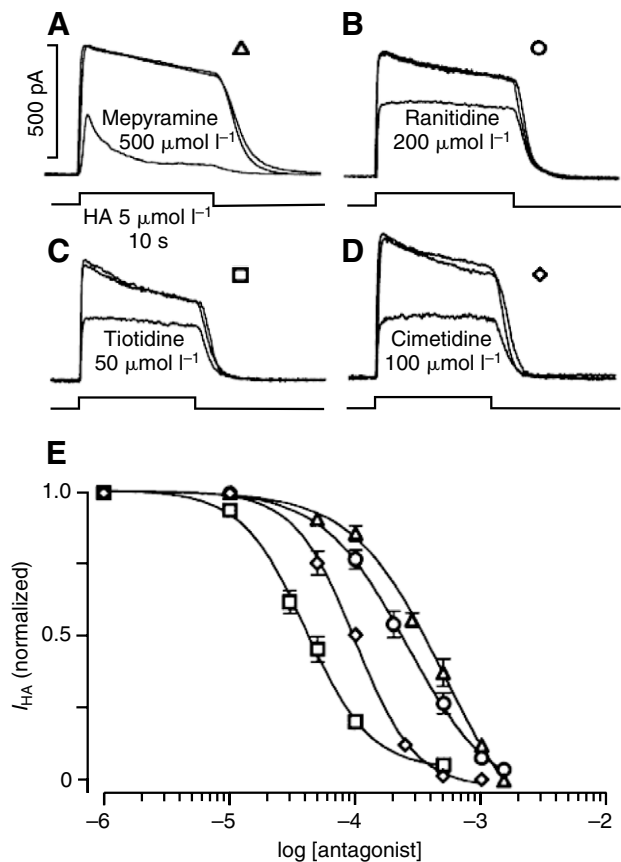

Fig. 6. Effects of HAergic antagonists on the HA evoked-current in X-organ neurons. (A–D) Current traces evoked by HA ( $5\ \mu\text{mol l}^{-1}$ , 10 s) after, during and before the superfusion of H1 and H2 antagonists at the indicated concentrations; all the records were obtained at a holding potential of  $-40\ \text{mV}$ , and the interval between pulses was 3 min. Note that in all cases the blockage was reversible. (E) Normalized peak currents (mean  $\pm$  s.e.m.) versus  $\log$  molar concentration of H1 and H2 antagonists (4–6 observations per point; see the  $\text{IC}_{50}$  values in the text). Squares, tiotidine; diamonds, cimetidine; circles, ranitidine; triangles, mepyramine.

X-organ nuclei; this cell projects its primary axon through the internal capsule and its secondary axons branched extensively in the neuropile of the medulla terminalis (Fig. 7B). Finally, two pairs of monopolar neurons were located dorsal and externally at the rim of the hemiellipsoidal body; the long primary axons of these neurons penetrate the inner capsule projecting in the direction of the X-organ, crossing the midline and branching too in the neuropile of medulla terminalis (Fig. 7C). In this region, the axons of the X-organ neurons bifurcate extensively and receive synaptic inputs (Iwasaki and Satow, 1971), so it is reasonable to suppose that the HAergic neurons contact with the neurosecretory system, however to date there are no reports to suggest that these presynaptic effects are evoked by the XO-SG system.

#### Discussion

In agreement with our previous observations, during the transition from day to night, HA concentration in crayfish hemolymph decays to the lowest levels, suggesting that the

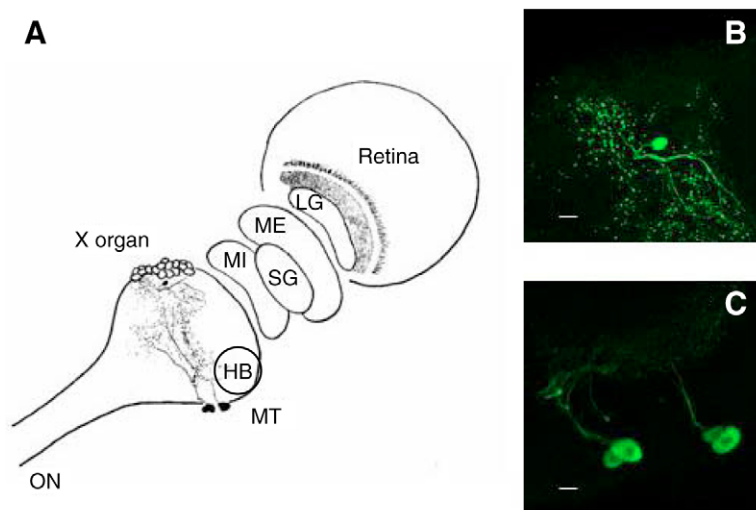

Fig. 7. Distribution of HA immunoreactivity in the crayfish eyestalk. (A) Schematic representation of a dorsal view of the eyestalk and the relative position of HAergic like single neurons. LG, lamina ganglionaris; ME, medulla externa; SG, sinus gland; MI, medulla interna; MT, medulla terminalis; HB, hemielipsoidal body; ON, optic nerve. (B,C) FITC fluorescence for HA immunoreactive neurons observed by confocal microscopy; image compositions were done by merging 200 slides (1  $\mu\text{m}$  section thickness). Scale bars, 20  $\mu\text{m}$ .

tonic inhibition of the X-organ neurons is removed, allowing recovery of the input resistance and consequently the capacity to generate burst firing (Cebada et al., 2006). Long-term intracellular recordings from X-organ neurons showed that the cells are silent or display a low-level of tonic activity during the morning and early afternoon hours, but change dramatically toward the late evening to a fully-fledged pattern of burst activity (García and Aréchiga, 1998). Overall these studies proved that HA is involved in the modulation of the X-organ excitability. In the present study, we have demonstrated that HA operates  $\text{Cl}^-$ -gated channels in the X-organ neurons. These findings indicate that control of neural activity by HA could be a mechanism underlying the hormonal secretion from the XO-SG system to synchronize a variety of circadian physiological functions.

#### HA activates a $\text{Cl}^-$ conductance

Four pharmacologically distinct metabotropic G-protein-coupled HA receptor subtypes have been described and cloned from mammals (Gantz et al., 1991; Yamashita et al., 1991; Lovenberg et al., 1999), and two ionotropic receptors predicted from *Drosophila melanogaster* genome coding for HA-gated  $\text{Cl}^-$  channels by functional expression in *Xenopus oocytes* have been described (Gisselmann et al., 2002; Zheng et al., 2002). HA directly activates a  $\text{Cl}^-$  conductance in a number of invertebrates, including mollusks (McCaman and Weinreich, 1985), insects (Hardie, 1989; Stuart, 1999) and crustaceans (Clairborne and Selverston, 1984; Prell and Green, 1986; McClintock and Ache, 1989; Hashemzadeh-Gargari and Freschi, 1992). The receptor types mediating these effects are unknown, but could be related to the novel ligand-gated anion channel from the fruit fly. Our results indicate that exogenous HA elicits an inhibitory response in both *in situ* and cultured X-organ neurons; this response is mediated by an increase in membrane conductance that reversed at the expected  $\text{Cl}^-$  equilibrium potential. In addition the time course of the response to HA developed with short latency, and the long-term stability of whole cell currents in the presence of only simple saline support the notion that the  $\text{Cl}^-$  current in X-organ neurons is generated by ionotropic receptors.

#### Pharmacology of the HA receptor

In agreement with previous reports (Clairborne and Selverston, 1984; McClintock and Ache, 1989; Hashemzadeh-Gargari and Freschi, 1992; el Manira and Clarac, 1994), we found that picrotoxin at concentrations between 10 and 100  $\mu\text{mol l}^{-1}$  was incapable of blocking the  $\text{Cl}^-$  current evoked by HA. This is an advantage, making it easy to distinguish between the GABA- or the Glu-gated  $\text{Cl}^-$  currents that are present in X-organ neurons. In addition, the DM-HisCl receptors expressed in oocytes show a weak sensitivity to picrotoxin (Gisselmann et al., 2002; Zheng et al., 2002).

The HAergic antagonists H1 and H2 have been used to characterize native HA-invertebrate receptors and the HA evoked current is consistently more sensitive to H2 blockers (Haride, 1988; McClintock and Ache, 1989; Hashemzadeh-Gargari and Freschi, 1992; Gisselmann et al., 2002). In the X-organ neurons the HA response was more efficiently inhibited by H2 antagonists (tiotidine, cimetidine and ranitidine) than by the H1 antagonist (mepyramine). The pharmacological profile that we found is close to that reported for the homomeric DM-HisCl- $\alpha 2$  receptor (Gisselmann et al., 2002); however it could correspond to the expression of the homomeric channels HisCl-1 (Zheng et al., 2002). Further studies of molecular biology should help to confirm the homology between fruit fly HA receptors and crustacean HA receptors.

#### List of abbreviations

|                      |                                                                     |
|----------------------|---------------------------------------------------------------------|
| DM-HisCl- $\alpha 1$ | HA $\text{Cl}^-$ subunit type 1 from <i>Drosophila melanogaster</i> |
| DM-HisCl- $\alpha 2$ | HA $\text{Cl}^-$ subunit type 2 from <i>Drosophila melanogaster</i> |
| dTC                  | <i>d</i> -tubocurarine                                              |
| EC <sub>50</sub>     | half-maximal effective concentration                                |
| FITC                 | fluorescein isothiocyanate                                          |
| GABA <sub>A</sub>    | $\gamma$ -aminobutyric acid receptor type A                         |
| Glu                  | glutamate                                                           |
| H1                   | HA receptors type 1                                                 |
| H2                   | HA receptors type 2                                                 |
| HA                   | histamine                                                           |
| HB                   | hemielipsoidal body                                                 |
| HisCl-1              | histamine subunit type 1                                            |

|                  |                                       |
|------------------|---------------------------------------|
| IC <sub>50</sub> | half-maximal inhibitory concentration |
| LG               | lamina ganglionaris                   |
| ME               | medulla externa                       |
| MI               | medulla interna                       |
| MT               | medulla terminalis                    |
| ON               | optic nerve                           |
| PBS              | sodium phosphate buffer               |
| XO-SG            | X-organ sinus gland                   |

We acknowledge Elizabeth Becerra for the immunohistochemistry techniques. This work was supported by CONACyT, grant 38525-N (U.G.) and a fellowship by CONACyT 91894 to J.C.

### References

- Arnould, J. M.** (1987). Biosynthèse et métabolisme de l'histamine dans le système nerveux central de *Carcinus maenas*. *Arch. Int. Physiol. Biochim.* **95**, 43-55.
- Bayer, T. A., McClintock, T. S., Grunert, U. and Ache, B. W.** (1989). Histamine-induced modulation of olfactory receptor neurones in two species of lobster, *Panulirus argus* and *Homarus americanus*. *J. Exp. Biol.* **145**, 133-146.
- Cebada, J., Alvarado-Alvarez, R., Becerra, E., Neri-Bazan, L., Rocha, L. and García, U.** (2006). An improved method for long-term measuring of hemolymph fluctuations of non-essential amino acids, GABA and histamine from freely moving crayfish. *J. Neurosci. Methods* **153**, 1-7.
- Claiborne, B. J. and Selverston, A. I.** (1984). Histamine as a neurotransmitter in the stomatogastric nervous system of the spiny lobster. *J. Neurosci.* **4**, 708-721.
- Cleland, T. A.** (1996). Inhibitory glutamate receptor channels. *Mol. Neurobiol.* **13**, 97-136.
- Dando, M. R. and Selverston, A. I.** (1972). Command fibers from the supraesophageal ganglion to stomatogastric ganglion in *Panulirus argus*. *J. Comp. Physiol.* **78**, 138-175.
- Duan, S. and Cooke, I. M.** (2000). Glutamate and GABA activate different receptors and Cl<sup>-</sup> conductances in crab peptide-secretory neuron. *J. Neurophysiol.* **83**, 31-37.
- el Manira, A. and Clarac, F.** (1994). Presynaptic inhibition is mediated by histamine and GABA in the crustacean escape reaction. *J. Neurophysiol.* **71**, 1088-1095.
- Fingerman, M.** (1997). Crustacean endocrinology: a retrospective prospective and introspective analysis. *Physiol. Zool.* **70**, 257-269.
- Gantz, I., Munzet, G., Tashiro, T., Schaffer, M., Wang, L., Del Valle, J. and Yamada, T.** (1991). Molecular cloning of the human histamine H2 receptor. *Biochem. Biophys. Res. Commun.* **178**, 1386-1392.
- García, U. and Aréchiga, H.** (1998). Regulation of crustacean neurosecretory cell activity. *Cell. Mol. Neurobiol.* **18**, 81-99.
- García, U., Grumbacher-Reinert, S., Bookman, R. and Reuter, H.** (1990). Distribution of Na and K currents in soma, axons and growth cones of leech Retzius neurones in culture. *J. Exp. Biol.* **150**, 1-17.
- Garduño, J., Elenes, S., Cebada, J., Becerra, E. and García, U.** (2002). Expression and functional characterization of GABA transporters in crayfish neurosecretory cells. *J. Neurosci.* **22**, 9176-9184.
- Gisselmann, G., Pusch, H., Hovemann, B. T. and Hatt, H.** (2002). Two cDNAs coding for histamine-gated ion channels in *D. melanogaster*. *Nat. Neurosci.* **5**, 11-12.
- Hanumante, M. M. and Fingerman, M.** (1982). Inhibitory effect of histamine on the release of melanine-dispersing hormone in the fiddler crab *Uca pugilator*. *Biol. Bull.* **162**, 256-272.
- Hardie, R. C.** (1989). A histamine-activated chloride channel involved in neurotransmission at a photoreceptor synapse. *Nature* **339**, 704-706.
- Hashemzadeh-Gargari, H. and Freschi, J. E.** (1992). Histamine activates chloride conductance in motor neurons of the lobster cardiac ganglion. *J. Neurophysiol.* **68**, 9-15.
- Hille, B.** (2001). Modulation, slow synaptic action and second messengers. In *Ion Channels of Excitable Membranes*, pp. 201-236. Sunderland, MA: Sinauer.
- Iwasaki, S. and Satow, Y.** (1971). Sodium- and calcium-dependent spike potentials in the secretory neuron soma of the X-organ of the crayfish. *J. Gen. Physiol.* **57**, 216-236.
- Langworthy, K., Helluy, S., Benton, J. and Beltz, B.** (1997). Amines and peptides in the brain of the American lobster: immunocytochemical localization patterns and implications for brain function. *Cell Tissue Res.* **288**, 191-206.
- Lovenberg, T. W., Roland, B. L., Wilson, S. J., Jiang, X., Pyati, J., Huvar, A., Jackson, M. R. and Erlander, M. G.** (1999). Cloning and functional expression of the human histamine H3 receptor. *Mol. Pharmacol.* **55**, 1101-1107.
- Lunt, G. G.** (1991). GABA and GABA receptors in invertebrates. *Semin. Neurosci.* **3**, 251-258.
- McCaman, R. E. and Weinreich, D.** (1985). Histaminergic synaptic transmission in the cerebral ganglion of *Aplysia*. *J. Neurophysiol.* **53**, 1016-1037.
- McClintock, T. S. and Ache, B. W.** (1989). Ionic currents and ion channels of lobster olfactory receptor neurons. *J. Gen. Physiol.* **94**, 1085-1099.
- Mulloney, B. and Hall, W. M.** (1991). Neurons with histamine like immunoreactivity in the segmental and stomatogastric nervous systems of the crayfish *Pacifastacus leniusculus* and the lobster *Homarus americanus*. *Cell Tissue Res.* **266**, 197-207.
- Onetti, C. G., García, U., Valdósera, R. F. and Aréchiga, H.** (1990). Ionic currents in crustacean neurosecretory cells. *J. Neurophysiol.* **64**, 1514-1526.
- Orona, E., Battelle, B. A. and Ache, B. W.** (1990). Immunohistochemical and biochemical evidence for the putative inhibitory neurotransmitters histamine and GABA in lobster olfactory lobes. *J. Comp. Neurol.* **294**, 633-646.
- Prell, G. D. and Green, J. P.** (1986). Histamine as a neuroregulator. *Annu. Rev. Neurosci.* **9**, 209-254.
- Roeder, T.** (2003). Metabotropic histamine receptors – nothing for invertebrates? *Eur. J. Pharmacol.* **466**, 85-90.
- Sigvardt, K. A. and Mulloney, B.** (1982). Sensory alteration of motor patterns in the stomatogastric nervous system of the spiny lobster *Panulirus interruptus*. *J. Exp. Biol.* **97**, 137-152.
- Stuart, A. E.** (1999). From fruit flies to barnacles, histamine is the neurotransmitter of arthropod photoreceptors. *Neuron* **22**, 431-433.
- Wachowiak, M. and Cohen, L. B.** (1999). Presynaptic inhibition of primary olfactory afferents mediated by different mechanisms in lobster and turtle. *J. Neurosci.* **19**, 8808-8817.
- Witte, I., Kreienkamp, H. J., Gewecke, M. and Roeder, T.** (2002). Putative histamine-gated chloride channel subunits of the insect visual system and thoracic ganglion. *J. Neurochem.* **83**, 504-514.
- Yamashita, M., Fukui, H., Sugama, K., Horio, Y., Ito, S., Mizuguchi, H. and Wada, H.** (1991). Expression cloning of a cDNA encoding the bovine histamine H1 receptor. *Proc. Natl. Acad. Sci. USA* **88**, 11515-11519.
- Zheng, Y., Hirschberg, B., Yuan, J., Wang, A. P., Hunt, D. C., Ludmerer, S. W., Schmatz, D. M. and Cully, D. F.** (2002). Identification of two novel *Drosophila melanogaster* histamine-gated chloride channel subunits expressed in the eye. *J. Biol. Chem.* **277**, 2000-2005.
